# Supplementary material for: Optimizing Treatment for Depression in Primary Care Using Psychotherapy Versus Antidepressant Medication in a Low-Resource Setting: Protocol for the OptimizeD Randomized Controlled Trial
Source: Research Square preprint supplement (doi:10.21203/rs.3.rs-6716211/v1), 2025-05-23
Supplement: Supplementary file 1 [file a90677ad413d30fa9b568664.docx]

**Appendix: Optimizing Treatment for Depression in Primary Care Using Psychotherapy Versus Antidepressant Medication in a Low-Resource Setting: Protocol for the OptimizeD Randomized Controlled Trial**

**Table A1: SPIRIT 2025 expanded checklist**

| **Section / Topic** | **No** | **SPIRIT 2025 checklist item description** | **Expanded items to report** | **Addressed on page number** |
| --- | --- | --- | --- | --- |
| **Administrative information** | | |  |  |
| Title and structured summary | 1a | Title stating the trial design, population, and interventions, with identification as a protocol | - Descriptive title stating:   - Trial design (e.g., parallel group randomised trial)   - Conceptual framework (e.g., superiority, non-inferiority)   - Trial phase (if applicable)   - Population   - Intervention/comparator   - Objective or primary outcome   - “Protocol” | 1 |
| 1b | Structured summary of trial design and methods, including items from the World Health Organization Trial Registration Data Set | - Relevant items from the WHO Trial Registration Data Set:   - Primary Registry and Trial Identifying Number   - Secondary Identifying Numbers   - Source(s) of Monetary or Material Support   - Primary Sponsor   - Contact for Public Queries   - Contact for Scientific Queries   - Public Title   - Scientific title   - Countries of Recruitment   - Health Condition(s) or Problem(s) Studied   - Intervention(s)   - Key Inclusion and Exclusion Criteria   - Study Type   - Date of First Enrollment (planned)   - Sample Size   - Primary outcome(s)   - Key Secondary outcome(s)   - Ethics Review   - Individual Trial Participant Data sharing statement | All WHO items are met with the trial’s registration in the ClinicalTrials.gov (NCT05944926) and study protocol. |
| Protocol version | 2 | Version date and identifier | - Version date - Version identifier (e.g., Version 2.0) - List of changes made relative to the previous protocol version, with reasons | 19 |
| Roles and responsibilities | 3a | Names, affiliations, and roles of protocol contributors | For each protocol contributor:   - Name - Affiliation - Description of contributions, including use of artificial intelligence technologies, if applicable | 1, 19 |
| 3b | Name and contact information for the trial sponsor | For the trial sponsor (e.g. individual, company, institution, or organization):   - Name - Contact information - Regulatory agency identifying number (if applicable) | 1 |
| 3c | Role of trial sponsor and funders in design, conduct, analysis, and reporting of trial; including any authority over these activities | For the Sponsor and funders:   - Roles and responsibilities in trial design, conduct, data analysis and interpretation, manuscript writing, and results dissemination - Who will make final decision regarding the above trial aspects - Whether the sponsor or funder will have the right to review or comment on the trial manuscript - Any mechanisms used to mitigate funder influence. If the funder will have no direct involvement in the trial, then this should be explicitly stated. | 19 |
| 3d | Composition, roles, and responsibilities of the coordinating site, steering committee, endpoint adjudication committee, data management team, and other individuals or groups overseeing the trial, if applicable | For each trial committee:   - Roles and responsibilities - Relationship to trial sponsor and funders - Outline of membership (e.g., clinician, biostatistician, patient) - Names of Chairs and members, when known   Examples of committees include:   - Trial Steering Committee (executive decisions) - Trial Management Group (day-to-day trial conduct) - Data Monitoring Committee (review of accumulating data) - Endpoint adjudication committee - Data management team - Other individuals or groups overseeing the trial | 16, Table 4 |
| **Open science** | | |  |  |
| Trial registration | 4 | Name of trial registry, identifying number (with URL), and date of registration. If not yet registered, name of intended registry | - Name of registry - Trial registry identifying number - URL to registry record - Date of registration | 2 |
| Protocol and statistical analysis plan | 5 | Where the trial protocol and statistical analysis plan can be accessed | - Where the protocol will be accessible (e.g., publication, repository such as Open Science Framework, trial registry) - Where the full statistical analysis plan will be accessible | Available on the ClinicalTrials.gov registry and study protocol. |
| Data sharing | 6 | Where and how the individual de-identified participant data (including data dictionary), statistical code, and any other materials will be accessible | - What data and materials will be shared; for example:   - De-identified participant data, data dictionary, analytical code used to process the data   - Materials associated with the intervention (e.g., handbook or video for non-pharmacological interventions) - How the data and materials will be shared with trial investigators and external parties, including:   - Application process to access the data (if applicable)   - Data transfer process (e.g., via repository or direct transfer to user)   - Any plans to obtain consent from participants - If no sharing is planned, this should be clearly stated with an explanation | 19 |
| Funding and conflicts of interest | 7a | Sources of funding and other support (e.g., supply of drugs) | For each funding source:   - Name of funder - Type of funding:   - Direct monetary support   - Indirect support (free trial drugs, equipment, or services such as statistical analysis or use of medical writers) | 19 |
| 7b | Financial and other conflicts of interest for principal investigators and steering committee members | - Conflicts of interests for principal trial investigators and members of key committees involved in the trial (e.g. steering and data monitoring committees), including any of the following support received:   - Financial: Salary support or grants; ownership of stock or options; honoraria (e.g., for advice, authorship, or public speaking); paid consultancy or service on advisory boards; and holders of patents or patents pending   - Non-financial: academic commitments; personal or professional relationships; and other affiliations with special interests or advocacy positions - Any procedures planned to reduce the potential influence of conflicts of interest on the trial’s design, conduct, analysis, or reporting - If no conflicts of interest, this should be clearly stated | 19 |
| Dissemination policy | 8 | Plans to communicate trial results to participants, healthcare professionals, the public, and other relevant groups (e.g., reporting in trial registry, plain language summary, publication) | - Plan to disseminate trial results to participants, healthcare professionals, the public, and other relevant groups (e.g., reporting results in trial registry, preprint, plain language summary, publication in open access journal) - Process and timeframe for approving and submitting reports for dissemination - Authorship guidelines | 19. Authorship will be determined based on substantial contributions to the study in accordance with ICMJE guidelines. |
| **Introduction** | | |  |  |
| Background and rationale | 9a | Scientific background and rationale, including summary of relevant studies (published and unpublished) examining benefits and harms for each intervention | - Importance of the research question - Why a new trial is needed in the context of available evidence   - Explanation of how the intervention might work   - Pre-trial evidence of the benefits and harms of the intervention   - Reference to systematic review(s) of relevant trials; if none available, a summary of relevant evidence based on a systematic search | 2-3 |
|  | 9b | Explanation for choice of comparator | - Why the particular comparator group was chosen - Whether the comparator represents standard of care | 2-3, 7-8 |
| Objectives | 10 | Specific objectives related to benefits and harms | - Trial objectives related to benefits and harms including:   - Participants   - Intervention   - Comparator   - Primary outcome(s)   - Time point of main interest - Description of trial estimand(s), as appropriate | 4, Table 1 |
| **Methods: Patient and public involvement, trial design** | | |  |  |
| Patient and public involvement | 11 | Details of, or plans for, patient or public involvement in the design, conduct, and reporting of the trial | - Planned methods of patients and public involvement at different trial stages (e.g., design, conduct, reporting) - Who is involved (e.g., patients, carers, members of the public) - If no patient or public involvement planned, this should be stated | Patient and public involvement was integrated throughout the design and conduct of the trial. We conducted a pilot study with 200 participants to test study procedures and gather feedback on the feasibility and acceptability of all measures. Additionally, we engaged with healthcare professionals to refine study protocols and intervention delivery. Feedback from participants and healthcare providers informed modifications to the assessment tools and intervention procedures to ensure cultural relevance and feasibility in the primary care setting. |
| Trial design | 12 | Description of trial design including type of trial (e.g., parallel group, crossover), allocation ratio, and framework (e.g., superiority, equivalence, non-inferiority, exploratory) | - Type of trial design (e.g., parallel group) - Conceptual framework (e.g.,superiority, non-inferiority, or equivalence) - Unit of randomisation (e.g., individual participant) - Allocation ratio (e.g., 1:1) | 4 |
| **Methods: Participants, interventions, and outcomes** | | |  |  |
| Trial setting | 13 | Settings (e.g., community, hospital) and locations (e.g., countries, sites) where the trial will be conducted | - Setting of participant recruitment (e.g., primary or tertiary care; outpatient community or hospital clinic; inpatient unit) - Location(s) where the trial will be carried out (e.g., country, city) - Planned number of sites | 5 |
| Eligibility criteria | 14a | Eligibility criteria for participants | - Specific inclusion and exclusion criteria defining the trial population to be randomised | 5 |
| 14b | If applicable, eligibility criteria for sites and for individuals who will deliver the interventions (e.g., surgeons, physiotherapists) | If applicable:   - Eligibility criteria for sites (e.g., site volume for surgical procedure) - Eligibility criteria for individuals delivering the interventions (e.g., surgeons, physiotherapists), such as professional qualifications, years in practice, skills, or validation of specific training before trial initiation | 5, 7-8 |
| Intervention and comparator | 15a | Intervention and comparator with sufficient details to allow replication including how, when, and by whom they will be administered. If relevant, where additional materials describing the intervention and comparator (e.g., intervention manual) can be accessed | - Details of each intervention and comparator to allow replication, including:   - Components of the intervention and comparator   - How they will be administered   - When and for how long they will be administered   - Any procedure for tailoring the intervention to individual participants   - Any physical or informational materials to be used as part of the intervention/comparator (e.g., instruction manual) and where the materials will be made accessible - When comparator group is “usual care”:   - Description of usual care and any plans to track and measure it during the trial   - Whether the intervention group will also receive usual care | 7-9 |
| 15b | Criteria for discontinuing or modifying allocated intervention/comparator for a trial participant (e.g., drug dose change in response to harms, participant request, or improving/worsening disease) | - Criteria to guide modifications to trial intervention/comparator (e.g., drug dose change in response to harms, participant request, or improving/worsening disease) - Criteria to guide discontinuation of trial intervention/comparator | 10, Table 3 |
| 15c | Strategies to improve adherence to intervention/comparator protocols, if applicable, and any procedures for monitoring adherence (e.g., drug tablet return, sessions attended) | - Strategies for improving fidelity of care providers and adherence of participants to intervention/comparator protocols, if applicable - When and how fidelity of care providers and adherence of participants to intervention/comparator protocols will be assessed, if applicable - Where appropriate, prespecified definition for classifying participants as being treated as planned or not | 9-10 |
| 15d | Concomitant care that is permitted or prohibited during the trial | - Relevant concomitant care that is allowed (e.g., rescue interventions) or prohibited during the trial - Any plans to record concomitant care received, including “usual care” | 10 |
| Outcomes | 16 | Primary and secondary outcomes, including the specific measurement variable (e.g., systolic blood pressure), analysis metric (e.g., change from baseline, final value, time to event), method of aggregation (e.g., median, proportion), and time point for each outcome | - Specification of which outcomes are primary and secondary - Rationale for the choice of trial outcomes and whether they are part of a core outcome set - For each outcome:   - Specific variable to be measured (e.g., Beck Depression Inventory score, all-cause mortality), with definition where relevant   - Analysis metric for each participant (e.g., change from baseline, end value, time-to-event)   - Summary measure for each study group (e.g., mean, proportion with score > 2)   - Time point of interest for analysis (e.g., 3 months) | 4, Table 1, Table A2 |
| Harms | 17 | How harms are defined and will be assessed (e.g., systematically, non-systematically) | For each systematically assessed harm (active/targeted surveillance):   - Definition and measurement (e.g., name of validated questionnaire) - Where appropriate, the metrics, method of aggregation, and time point of interest for analysis - Procedures for harms assessment, including:   Who will do the assessment, and whether they will be blinded to the allocated trial group   - - Assessment time points and overall time period for recording harms   For each non-systematically assessed harm (passive surveillance):   - How data will be collected - Assessment time points and overall time period for recording harms - Process for coding each adverse event and grading its severity, including:   - Who will do the coding and severity grading, and whether they will be blinded to the allocated trial group   - Which coding and severity grading systems will be used, if any   For grouping of harms by seriousness, severity, body system, discontinuation of intervention (due to harms), and causality:   - Definitions of grouping categories - Who will do the grouping, and whether they will be blinded to the allocated trial group   If relevant:   - Process of reporting important adverse events to applicable groups (e.g, sponsor, regulator, data monitoring committee) | Harms will be assessed systematically throughout the trial, including suicide risk at all study assessments (pages 5-6) and side effects (pages 7-9, Table 2). The definition of serious adverse events and reporting procedures are detailed on page 16. |
| Participant timeline | 18 | Time schedule of enrolment, interventions (including any run-ins and washouts), assessments, and visits for participants. A schematic diagram is highly recommended (see Figure). | - Schematic diagram outlining the schedule and time commitment for trial participants, including:   - Timeline of trial visits starting from eligibility screening to trial close-out   - Timeline of interventions including any run-in and washout periods   - Procedures and assessments performed at each visit, referencing specific data collection forms, if relevant | 5-6, Table 2, Figure 1 |
| Sample size | 19 | How sample size was determined, including all assumptions supporting the sample size calculation | For sample size calculations:   - Primary outcome (and any other outcome) on which the calculations are based - Outcome values (e.g., proportion) assumed for each group, with rationale - Target difference in outcome values between trial groups (including common standard deviation for continuous outcomes), with rationale - Statistical significance level or α (type I) error - Statistical power or β (type II) error - Any upward adjustments (e.g., accounting for missing data or non-adherence) - Target sample size per trial group - Any software used | 11 |
| Recruitment | 20 | Strategies for achieving adequate participant enrolment to reach target sample size | - Planned strategies to promote adequate enrolment (e.g., advertisements, pre-screening of health records, reducing participant burden) - Where participants will be recruited (e.g., primary care clinic, community), by whom (e.g., surgeon), and when (e.g., time period after diagnosis) | 5-6 |
| **Methods: Assignment of interventions** | | |  |  |
| Randomization: |  |  |  |  |
| Sequence generation | 21a | Who will generate the random allocation sequence and the method used | - Who will generate the allocation sequence - Method of sequence generation (e.g., computerized random number generator) - Any software used | 6 |
| 21b | Type of randomization (simple or restricted) and details of any factors for stratification. To reduce predictability of a random sequence, other details of any planned restriction (e.g., blocking) should be provided in a separate document that is unavailable to those who enroll participants or assign interventions | - Type of randomization: simple versus restricted (e.g., blocked); fixed versus adaptive (e.g., minimization); and where relevant, the reasons for such choices - If applicable, factors (e.g., trial site, sex, disease stage) to be used for stratification, including categories and relevant cut-off boundaries. - For restricted randomization:aside from the above, all other details on restriction (including minimization) should be provided in a separate document in order to reduce predictability of the random sequence | 6 |
| Allocation concealment mechanism | 22 | Mechanism used to implement the random allocation sequence (e.g., central computer/telephone; sequentially numbered, opaque, sealed containers), describing any steps to conceal the sequence until interventions are assigned | - How the individuals enrolling participants will be kept unaware of the next trial group assignment in the random sequence (not to be confused with blinding) | 6 |
| Implementation | 23 | Whether the personnel who will enroll and those who will assign participants to the interventions will have access to the random allocation sequence | - Who will have access to the random allocation sequence - Who will enroll participants - Who will assign participants to interventions - Whether the personnel enrolling and assigning participants will have no access to the random allocation sequence   When individuals involved in sequence generation and allocation concealment are the same individuals involved in the implementation of assignment:   - How and where the random allocation list will be securely stored - Any mechanisms to prevent those enrolling and assigning participants from accessing the list | 6 |
| Blinding | 24a | Who will be blinded after assignment to interventions (e.g., participants, care providers, outcome assessors, data analysts) | - Who will be blinded to treatment assignments:   - Trial participants   - Care providers (i.e., those administering the intervention)   - Outcome assessors (i.e., those who determine if a participant experienced the outcome of interest). e.g., the participant (for patient-reported outcomes), care provider, or independent observer   - Data analysts performing the statistical analysis | 6 |
| 24b | If blinded, how blinding will be achieved and description of the similarity of interventions | For blinded trials:   - Mechanism to establish blinding (e.g., identical placebo, double-dummy) - Any similarities or differences in characteristics (e.g. appearance, taste) of the interventions being compared - Any procedures intended to maintain blinding and reduce risk of accidental unblinding - Any procedures intended to evaluate blinding procedures (e.g., pre-trial testing of blinding procedures) | 6 |
| 24c | If blinded, circumstances under which unblinding is permissible, and procedure for revealing a participant’s allocated intervention during the trial | For blinded trials:   - Circumstances under which unblinding is permissible during the trial (e.g., to reduce immediate risk for a participant) - Procedure for revealing a participant’s allocated intervention during the trial | 6 |
| **Methods: Data collection, management, and analysis** | | |  |  |
| Data collection methods | 25a | Plans for assessment and collection of trial data, including any related processes to promote data quality (e.g., duplicate measurements, training of assessors) and a description of trial instruments (e.g., questionnaires, laboratory tests) along with their reliability and validity, if known. Reference to where data collection forms can be accessed, if not in the protocol | - Who will assess the outcome (e.g., participant, doctor, nurse, caregiver) - Who will collect the data (e.g., participant, doctor, nurse, caregiver) - Mode of data collection (e.g., paper-based data collection, mobile devices) - Description of data collection instruments (e.g. validated questionnaires, laboratory instruments), including reliability and validity - Processes to promote quality of data collection (e.g., duplicate measurements, training of assessors) - Where the data collection form can be accessed (e.g., appendix, link to repository) - Any pilot testing and assessment of reliability and validity of the forms, if performed | 5-6, 11-12, Table A2 |
| 25b | Plans to promote participant retention and complete follow-up, including list of any outcome data to be collected for participants who discontinue or deviate from intervention protocols | - Retention strategies to promote complete follow-up and prevent missing data - List of outcome data that will be collected for participants who discontinue or deviate from intervention protocols - Any plans to record the reasons for:   - Non-adherence (e.g., discontinuation of intervention due to harms versus lack of efficacy)   - Non-retention (withdrawal from trial, lost to follow-up) | 10 |
| Data management | 26 | Plans for data entry, coding, security, and storage, including any related processes to promote data quality (e.g., double data entry; range checks for data values). Reference to where details of data management procedures can be accessed, if not in the protocol | - Processes for data management, including:   - Data entry and coding, including measures to reduce errors (e.g., double data entry; range checks for data values):   - Data security   - Data storage, including time frame - Reference to where full information can be found (e.g., Data Management Plan), if not in the protocol | 11-12 |
| Statistical methods | 27a | Statistical methods used to compare groups for primary and secondary outcomes, including harms | - Statistical methods for each analysis   - Main analysis method for statistical comparison   - Effect measure (e.g., absolute risk) with confidence intervals   - Statistical significance level   - For Bayesian analysis: choices of priors, computational choices, details of any modelling, and effect measure with credible intervals - For adjusted analyses (if applicable):   - Rationale for adjusted analyses   - List of covariates for adjustment   - Statistical methods   - If both adjusted and non-adjusted analyses are planned, which will be the main analysis - Methods to account for multiplicity, if applicable - Reference to the full statistical analysis plan, if a separate document exists | 12-16 |
| 27b | Definition of who will be included in each analysis (e.g., all randomized participants), and in which group | - Who will be included in the primary and other analyses (e.g. all randomized participants with either observed or imputed outcome data)   - Any exclusions due to missing data or other reasons - Trial group in which participants will be analyzed (e.g., as-randomized) | 12-16 |
| 27c | How missing data will be handled in the analysis | For each analysis:   - Assumption about the missing data mechanism (e.g., missing at random), with justification - How missing data will be handled (e.g., multiple imputation, model-based approaches), with justification | 12-16 |
| 27d | Methods for any additional analyses (e.g., subgroup and sensitivity analyses) | For any planned subgroup analyses:   - Baseline variables to be explored - Rationale - Statistical methods (e.g., test of interaction) - Cut-points and rationale for categorization of continuous baseline variables (if applicable)   For any planned sensitivity analyses:   - Rationale - Statistical methods | 12-16 |
| **Methods: Monitoring** | | |  |  |
| Data monitoring committee | 28a | Composition of data monitoring committee (DMC); summary of its role and reporting structure; statement of whether it is independent from the sponsor and funder; conflicts of interest and reference to where further details about its charter can be found, if not in the protocol. Alternatively, an explanation of why a DMC is not needed | - Whether a DMC is planned, with rationale   If DMC is planned:   - Composition of DMC   - Size and characteristics of membership (e.g., type of expertise)   - Chair and member names (if known) - Roles and responsibilities - Reporting structure - Method of operation (e.g., meeting format and frequency) - Degree of independence from those conducting, sponsoring, or funding the trial - Reference to DMC charter where further details can be found | 16, Table 4 |
| 28b | Explanation of any interim analyses and stopping guidelines, including who will have access to these interim results and make the final decision to terminate the trial | Interim analyses:   - When they will be conducted (timing and indications), and by whom - Statistical methods - Who will have access to interim results, and whether they will be blinded   Stopping guidelines:   - Any criteria (statistical or non-statistical) that will be used to inform decisions about early stopping or other adaptations (e.g., sample size re-estimation) - Who will make the decision to continue, stop, or modify the trial | N/A |
| Trial monitoring | 29 | Frequency and procedures for monitoring trial conduct. If there is no monitoring, give explanation | - Approach for monitoring (e.g., central, remote, on-site, risk-based) - Scope of monitoring activities (e.g., type and amount of data at each site) - Anticipated frequency of monitoring activities - Who will be involved in monitoring - Reference where further details can be found (e.g., monitoring plan) - If no monitoring is planned, this should be stated with reasons | Table 4 |
| **Ethics** | | |  |  |
| Research ethics approval | 30 | Plans for seeking research ethics committee/institutional review board approval | - Plans to obtain research ethics committee/institutional review board approval | 19 |
| Protocol amendments | 31 | Plans for communicating important protocol modifications to relevant parties | - Process for making protocol amendments, including:   - Decision-making authority for protocol amendments   - How substantive changes will be communicated to relevant parties (e.g., REC/IRBs, trial registries, regulatory agencies) | 19 |
| Consent or assent | 32a | Who will obtain informed consent or assent from potential trial participants or authorized proxies, and how | - Role, experience, and training of individuals obtaining consent - How consent will be obtained from potential participants - If applicable, how assent will be obtained from paediatric participants who are too young to consent, including: - How information will be provided to potential participants - How their understanding and assent will be ascertained - Any plans to obtain proxy consent from potential adult participants who lack decisional capacity, including: - Who will determine the individual's decisional capacity - Any formal capacity instrument to be used - Any plan for securing informed agreement to continue participation once decisional capacity is regained | 19 |
| 32b | Additional consent provisions for collection and use of participant data and biological specimens in ancillary studies, if applicable | - How consent will be obtained for using participant data and biologic specimens in specified or unspecified ancillary studies - How the data and specimens will be collected and stored for ancillary studies | 19 |
| Confidentiality | 33 | How personal information about potential and enrolled participants will be collected, shared, and maintained in order to protect confidentiality before, during, and after the trial | - How confidentiality will be preserved when: - Collecting and maintaining personal information before, during, and after the trial - Transmitting data to sponsors, co-investigators, and external parties | 11-12, 19 |
| Ancillary and post-trial care | 34 | Provisions, if any, for ancillary and post-trial care, and for compensation to those who suffer harm from trial participation | - Any plans to provide or pay for ancillary care during the trial - Any care or benefits that will be provided to participants or host communities after trial completion - Any plans to compensate participants for trial-related harms - If no plans for ancillary and post-trial care, this should be stated with reasons | 11 |

**Table A2: OptimizeD baseline battery**

| **QUESTIONNAIRES** | | |
| --- | --- | --- |
| **Measure** | **Scoring and interpretation** | **Contextual use/validation** |
| *Primary outcome* | | |
| *Patient Health Questionnaire (PHQ-9).* The PHQ-9 is a tool that measures the frequency of depressive symptoms. 1 | There are 9 items that are rated on a 4-point Likert scale from 0 (not at all) to 3 (nearly every day). The total score ranges from 0 to 27, with higher scores indicating greater frequency of depressive symptoms | The PHQ-9 has previously been used in India.2,3 |
| *Mediators* | | |
| *Snaith Hamilton Pleasure Scale (SHAPS) – [revised].* The *SHAPS* is a 14-item self-report tool that assesses anhedonia. Each item covers a range of activities that participants rate on a 4-point Likert scale.4 We will utilize a subset of 4 items. | The total score ranges from 0 to 16, with higher scores indicating greater anhedonia | The SHAPS has previously been used in India.5,6 |
| *PREMIUM Abbreviated Activation Scale (PAAS).* The PAAS measures patient activation.7 | The PAAS consists of 5 items on a 5-point Likert scale ranging from 0 (not at all) to 4 (yes, completely). Total scores range from 0 to 20, with higher scores indicating greater levels of patient activation | PAAS has previously been used in India.8 |
| *The Analytical Rumination Questionnaire (ARQ) – [revised].* The ARQ is a 9-item self-report tool that measures rumination. It is composed of two latent factors—causal analysis and problem-solving analysis.9 We will utilize a subset of 6 items. | All items are on a 4-point Likert scale ranging from 1 (never) to 4 (all the time) | N/A |
| *Generalized Anxiety Disorder Assessment (GAD-7) [secondary outcome/mediator].* The GAD-7 is a 7-item self-report scale to screen for symptoms of generalized anxiety disorder.10 | Items are rated on a 4-point Likert scale from 0 (not at all) to 3 (nearly every day), with total scores ranging from 0 to 21 and higher scores indicating more severe anxiety symptoms | The GAD-7 was found to be valid for use in India.11,12 |
| *UCLA-3 Loneliness Scale.* The UCLA 3-item Loneliness Scale measures loneliness.13 | All items are on a 3-point Likert scale ranging from 1 (hardly ever) to 3 (often). Total scores range from 3 to 9, with higher scores indicating a higher level of loneliness. | The UCLA-3 has previously been used in India.14 |
| *Brief Version of the Pittsburgh Sleep Quality Index (B-PSQI).* The 6-item B-PSQI will be used to assess sleep problems.15 | Total scores range from 0 to 15, with higher values indicating worse quality of sleep | The B-PSQI has been validated in India.16 |
| *Sociodemographic characteristics* | | |
| *Sociodemographic questionnaire.* 21 items related to age, gender, marital status, children, education, literacy, employment, caste, religion, and living situation. | N/A | These questionnaire was implemented in India.8 |
| *Simple Poverty Scorecard for India.* The scale is a 10-item self-report tool that assesses the likelihood that a household falls below the poverty line based on certain indicators and characteristics (e.g., household size, education level, and access to assets).17 | Total scores range from 0 (below a poverty line) to 100 (above the poverty line) | The scorecard was developed using India’s Socio-Economic Survey (SES) conducted by the National Sample Survey Organisation. |
| *Clinical characteristics* | | |
| *History of illness.* The history of illness questionnaire is a modified version of the Composite International Diagnostic Interview (CIDI 5.0, Version 3.4). It consists of 7-items related to the participant history of low mood/depression. | Items are either free-response or multiple-choice. |  |
| *Medication Adherence.* We used 3-items to measure participant’s previous experience with medication adherence. | Each item is rated on a 3-point Likert scale from 0 (never) to 2 (often). The items are summed to give a range of scores from 0 to 6, with higher scores less adherence. |  |
| *Inventory of Depressive Symptomatology (IDS-SR) [revised].* Eight items of the IDS-SR are being used to assess the depression subtypes. Each item has four statements that reflect various degrees of symptom severity.18 | Scored on a four-point Likert scale, with higher scores indicating more severe depressive symptoms. We will follow Lamers et al. (2010) to identify depressive subtypes.19 | The IDS-SR has previously been used in India.20 |
| *Patient Health Questionnaire Somatic Symptom Severity Scale (PHQ-15) – [revised].* The PHQ-15 is a 15-item self-report tool that measures somatic symptoms.21 We will utilize a subset of 10 items. | The items are rated on a 3-point Likert scale from 0 (not bothered at all) to 2 (bothered a lot). The total scores will range from 0 to 20, with higher scores indicating severe levels of somatization | The PHQ-15 has previously been used in India.22 |
| *Antidepressant Side-Effect Checklist (ASEC).* The ASEC is a self-report tool that measures the side effects of antidepressant medication. We will inquire about 16 symptoms.23 | We will ask participants to rate each side-effect on a 4-point Likert scale, from 0 (absent) to 3 (severe). The higher the total score, the more severe the side effects. | The ASEC has been used in Nepal in a context similar to our study site.24 |
| *Beck Hopelessness Scale Short Version (BHS).* The BHS Short Version is a 4-item self-report tool that measures hopelessness.25 | All items have true or false response options. Higher scores reflect greater levels of hopelessness |  |
| *Preferences and expectations.* This is a 3-item questionnaire related to preferences and expectations of depression treatment. | Response options include medication treatment, psychotherapy, and no preference/expectation. |  |
| *Positive and Negative Affect Schedule Short Form (PANAS-SF) – [revised].* The PANAS-SF is a 10-item self-report tool that measures positive and negative affect.26 We will utilize a subset of 4 items. | All items are on a 5-point Likert scale ranging from 1 (very slightly or not at all) to 5 (extremely) | The PANAS has previously been used in India.27,28 |
| *Penn State Worry Questionnaire Abbreviated (PSWQ-A) – [revised].* The PSWQ is an 8-item self-report questionnaire that assesses worry.29 We will utilize a subset of 5 items. | All items are on a 5-point Likert scale ranging from 1 (not at all typical of me) to 5 (very typical of me). Higher scores indicate a higher level of worry | The PSWQ has previously been used in India.30 |
| *World Health Organization Well-Being Index (WHO-5) [secondary outcome].* The WHO-5 consists of 5-items that measure current mental well-being.31 | Each item is rated on 6-point Likert scale, ranging from 0 (not all the time) to 5 (all of the time). The total raw score, ranging from 0 to 25, is multiplied by 4 to give the final score, with 0 representing the worst imaginable well-being and 100 representing the best imaginable well-being. | The WHO-5 has been validated in India.32 |
| *Physical health and illness.* The physical health and illness questionnaire consists of 3 items from the Composite International Diagnostic Interview (CIDI 5.0, Version 3.4). The questions are related to physical health problems and chronic illness. |  |  |
| *Biometrics.* We will measure calibrated weight and height. | We will calculate BMIs. |  |
| *Psychiatric Comorbidities:* | | |
| *Columbia Suicide Severity Rating Scale Screen Version (C-SSRS) – [revised].* The last four items of the screener version of the C-SSRS will be used to assess suicidality.33 We will implement this scale among individuals who endorse the 9th item of the PHQ-9 (score of 2 or 3), which assesses suicidal thoughts. | Any positive response on any of the four items indicates a high-risk participant, who will then be referred to the trial psychiatrist. | The C-SSRS has previously been used in India 34. |
| *Alcohol Use Disorders Identification Test Concise (AUDIT-C).* The 3-item AUDIT-C is used to assess alcohol use.35 We will also use 1-item to measure an individual’s involvement with tobacco. | All three questions have multiple-choice response options. Total scores range from 0 to 12, with higher scores indicating that the participant’s drinking likely affects their well-being | The AUDIT-C has been validated in India.35,36 |
| *Standardized Assessment of Personality Abbreviated Scale (SAPAS).* The SAPAS is an 8-item self-report tool that assesses personality disorders.37 | All items have ‘yes’ or ‘no’ response options and total scores range from 0 to 8. A score of 3 or more indicates that a personality disorder is likely | The SAPAS has previously been used in India.38,39 |
| *Toronto Alexithymia Scale (TAS) – [revised].* The TAS is a 20-item self-report tool used to measure alexithymia.40 We will utilize a subset of 5 items. | Response options are on a 5-point Likert score ranging from 1 (strongly disagree) to 5 (strongly agree). Total scores range from 5 to 25, where higher scores indicate greater impairment | The TAS-20 has been validated in India.41 |
| *Panic Disorder Severity Scale Brief Form (PDSS).* The PDSS Brief Form is a 2-item self-report tool that assesses panic disorders.42 | The two items have response varying response options on a 5-point Likert scale. Total scores range from 0 to 8, with higher scores indicating presence of a more severe panic disorder | The PDSS has previously been used in India.43 |
| *Post-Traumatic Symptom Checklist Abbreviated (PCL).* The PCL Abbreviated is a 6-item self-report tool that assesses trauma/PTSD.44 | All items are on a 5-point Likert scale ranging from 1 (not at all) to 5 (extremely). A score of 14 or more suggests that the participant has difficulties with PTSD | The PCL has previously been used in India.45 |
| *Personality traits* | | |
| *Experiences in Close Relationships Scale Short Form (ECR-12) – [revised].* The ECR-12 is a 12-item self-report tool used to assess attachment style.46 We will utilize a subset of 4 items. | All items are rated on a 7-point Likert scale ranging from 1 (strongly disagree) to 7 (strongly agree). Higher scores indicate greater attachment. | The ECR has been validated in India.47 |
| *Big Five Personality Inventory (BFI-10).* The BFI-10 is a 10-item scale that measures Big Five personality traits, including extraversion and neuroticism (two target constructs).48 | The items are ranked on a 5-point Likert scale ranging from 1 (disagree strongly) to 5 (agree strongly). Different items are scored for extraversion, agreeableness, conscientiousness, neuroticism, and openness to experience. | The BFI-10 has previously been used in India.49,50 |
| *Short Scale Anxiety Sensitivity Index (SSASI).* The SSASI is a 5-item self-report tool that measures anxiety sensitivity.51 | All items are on a 5-point Likert scale ranging from 0 (very little) to 4 (very much). Total scores range from 0 to 20, with higher scores indicating a higher level of anxiety sensitivity. |  |
| *General Self-Efficacy Scale (GSE).* The GSE is a 10-item self-report tool that measures self-efficacy.52 We will utilize a subset of 4 items. | All items are on a 4-point Likert scale ranging from 1 (not true at all) to 4 (exactly true). Total scores range from 4 to 16, with higher scores indicating greater generalized self-efficacy | The GSE has previously been used in India.52,53 |
| *Rosenberg Self-Esteem Scale (RSE) – [revised].* The RSE is a 10-item self-report questionnaire that measures self-esteem.54 We will utilize a subset of 5 items. | All items are on a 4-point Likert scale ranging from strongly disagree to strongly agree. Total scores range from 0 to 15, with higher scores indicating higher self-esteem | The RSE has previously been used in India.55 |
| *Abbreviated Connor-Davidson Resilience Scale (CD-RISC-2).* The CD-RISC-2 is a 2-item self-report tool that measures resilience.56 | Both items are ranked on a 5-point Likert scale ranging from 0 (not at all true) to 4 (true nearly all of the time). Higher scores indicate higher resilience | The CD-RISC has previously been used in India.57 |
| *Dysfunctional Attitudes Scale (DAS-A-17) – [revised].* The DAS-A-17 is a 17-item self-report tool that assesses dysfunctional attitudes.58 We will utilize a subset of 4 items. | All items are ranked on a 7-point Likert scale ranging from 1 (totally disagree) to 7 (totally agree). Higher scores indicate more dysfunctional attitudes | The DAS has previously been used in India.59 |
| *Emotion Regulation Questionnaire (ERQ) – [revised].* The ERQ is a 10-item self-report tool that assesses emotional regulation.60 We will utilize a subset of 5 items. | All items are on a 7-point Likert scale ranging from 1 (strongly disagree) to 7 (strongly agree). There are two subscales (cognitive reappraisal fact and the expressive suppression facet). | The ERQ has previously been used in India.61 |
| *Life stress & support:* | | |
| *Adverse Childhood Experiences (ACE).* The ACE is a 10-item self-report tool that assesses childhood maltreatment.62 | All items have ‘yes’ or ‘no’ response options, and total scores range from 0 to 10. Higher scores suggest the participant is at high risk for toxic stress and health problems later in life | The ACE has been validated in India.63 |
| *Perceived Stress Scale (PSS) – [revised].* The PSS is a 10-item self-report tool that measures stressful life events.64 We will utilize a subset of 4 items. | All items are on a 5-point Likert scale ranging from 0 (never) to 4 (very often). Total scores range from 0 to 20, with higher scores indicate higher perceived stress. | The PSS has previously been used in India.65 |
| *Interpersonal violence.* A 2-item questionnaire from Patel (2019)66 is being used to measure interpersonal violence (IPV). | Response options for both questions are yes or no, and participants may refuse to answer. Participants endorsing any form of IPV will be considered to be experiencing IPV (score of 1). | The IPV has been used in India.66 |
| *Grief.* The grief questionnaire consists of 4 items that assess one’s experience with loss. | Two of the questions are on a 3-point Likert scale ranging from 1 (not at all) to 3 (a lot). |  |
| *Multidimensional Scale of Perceived Social Support (MSPSS) – [revised].* The MPSS is a 12-item self-report tool that assesses social support/relationships.67 We will utilize a subset of 6 items. | All items are rated on a 7-point Likert scale ranging from 1 (very strongly disagree) to 7 (very strongly agree). Total scores are calculated by summing across all items and then dividing by six. | The MSPSS has been validated in India.68 |
| *Impact measures* | | |
| *World Health Organization Disability Schedule II (WHODAS II) [secondary outcome].* The WHODAS-II consists of 16 items that capture the level of functioning across six life domains, including cognition, mobility, self-care, getting along, life activities, and participation in society.69 | Each item ranges from 1 (none) to 5 (extreme), with total scores from 12-60. Raw scores are converted to a summary score ranging from 0 (no disability) to 100 (full disability) | The WHODAS II has been validated in India.70 |
| *International Physical Activity Questionnaire Short Form (IPAQ-SF).* The IPAQ-SF is a 7-item self-report tool that measures physical activity in the past week. All questions require a response in a temporal format.71 | Total scores are determined by summing the duration (in minutes) and frequency (days) of walking, moderate-intensity, and vigorous activity. Three categorical levels include inactive, minimally active, and health-enhancing physical activity | The IPAQ has previously been used in India.72 |
| *Social Functioning Questionnaire (SFQ) – [revised].* The SFQ is an 8-item self-report questionnaire that assesses social functioning.73 We will utilize a subset of 4 items. | Each item is scored on a 4-point scale with a total score of 0-12. Higher scores indicate more difficulty with social functioning. |  |
| *Client Service Receipt Inventory Form (CSRI).* The CSRI is a tool used to measure the socioeconomic costs of receiving health care.74 | There are 34 items total with varying types of response options. The data collected through the CSRI will be used to calculate service costs and total costs of care for each participant. Unit costs of services itemized in the  CSRI – such as cost per outpatient visit – will be based  on locally conducted health facility costing exercises. | The CSRI has been used in India.8 |
| **NEUROCOGNITIVE TASKS** | | |
| We use a subset of neurocognitive tasks from the NIH-funded Longitudinal Aging Study in India (LASI-DAD), a groundbreaking, nationally-representative, longitudinal survey with rich data on different cognitive domains.75 The neurocognitive battery was validated in India (including Madhya Pradesh) and underwent a rigorous translation process to ensure cultural acceptability. The tasks included were the following:   - *Digit span task.* This task measures an individual’s short-term memory and working memory capacity. During the task, the individual is presented with a sequence of numbers and is asked to repeat them back in the same order (forward digit span) or in reverse order (backward digit span). The task is administered in a progressive manner, with the length of the digit sequences gradually increasing.76 - *Serial 7s task.* This task evaluates an individual’s attention, concentration, and mental arithmetic abilities. Participants are asked to subtract 7 from 100 and then asked to continue subtracting 7 from the previous result in each step.76 - *Symbol cancellation task*. This task assesses visual scanning, attention, and visual neglect. During the task, participants are given a sheet with different symbols. They are shown a symbol that is present among the different symbols. Participants are asked to quickly scan the sheet and circle the symbol shown to them.76 - *Constructional praxis task (with recall).* This task assesses an individual's ability to visually perceive and mentally manipulate spatial information, motor planning, and coordination skills. During the task, the individual is asked to replicate basic geometric shapes, such as circles, diamonds, rectangles, and cubes. Participants are asked to recall the shapes and draw them from memory after some time.76 - *RAVEN’s task.* The Raven’s matrices evaluate picture-based pattern reasoning. Each question presents a geometric picture with a section cut out. Participants are shown a set of pictures and are asked to identify the one that completes the pattern.76 - *Trail Making task.* The task evaluates an individual’s visual attention, processing speed, and executive functioning. Respondents are presented with a series of circles and squares of different sizes and asked to draw lines to connect them in a certain order.76   In addition, we included a *Reinforcement Learning Task* that dissociates learning from positive and negative feedback. The participant sees one of four stimuli (abstract geometric paintings) and is asked to make a prediction. Two of the stimuli are trained using only *positive feedback* for correct answers (incorrect answers result in no feedback). The other two stimuli are trained using only *negative feedback* for incorrect answers (correct answers result in no feedback). Among both the positive-feedback-trained and negative-feedback-trained cues, one is more strongly associated with Rain and the other with Sun. All associations follow a 90/10 probabilistic schedule. In past studies, this task dissociated the cognitive effects of depression from those of antidepressants.77 Prospectively, performance on this task could differentiate responders and non-responders to SSRI.78 Further, it was used to differentiate the cognitive signature of depression across different disorders.79 | | |
| **BIOLOGICAL AND GENOMICS DATA** | | |
| The blood samples will be analyzed in three ways:   - **Genome-wide genotyping (polygenic risk scores):** DNA extracted from blood samples will be processed using the Illumina Global Screening Array (GSA), a high-density microarray covering approximately 654,000 SNP markers. This platform includes multiethnic genome-wide content, curated clinical research variants, and quality control markers. The resulting data will be used to generate polygenic risk scores (PRS) for depression and other psychiatric traits. - **Targeted pharmacogenetic analysis (CYP2D6 and related genes):** In addition to PRS, the GSA allows extraction of variants in key pharmacogenes such as *CYP2D6*, *CYP2C19*, and *CYP2B6*, which are involved in the metabolism of antidepressant medications including SSRIs, TCAs, and SNRIs. We will also conduct targeted genotyping to assess copy number variants (CNVs) and eight clinically relevant SNPs (*1, *2, *3, *4, *5, *6, *10, *41) in the *CYP2D6* gene using TaqMan assays. This will enable us to classify participants into genotype-based metabolizer phenotypes (e.g., poor, intermediate, ultrarapid). - **Inflammatory marker (C-reactive protein):** Blood samples will also be used to measure baseline levels of C-reactive protein (CRP), an established marker of systemic inflammation. We will explore its association with treatment outcomes, contributing to research on inflammation as a potential moderator of antidepressant response. | | |

**References**

1. Kroenke, K., Spitzer, R. L. & Williams, J. B. The PHQ-9: validity of a brief depression severity measure. *J Gen Intern Med* **16**, 606–613 (2001).

2. Patel, V. *et al.* Detecting common mental disorders in primary care in India: a comparison of five screening questionnaires. *Psychological Medicine* **38**, 221–228 (2008).

3. Indu, P. S. *et al.* Reliability and validity of PHQ-9 when administered by health workers for depression screening among women in primary care. *Asian Journal of Psychiatry* **37**, 10–14 (2018).

4. Snaith, R. P. *et al.* A scale for the assessment of hedonic tone the Snaith-Hamilton Pleasure Scale. *Br J Psychiatry* **167**, 99–103 (1995).

5. Amr, M. & Volpe, F. M. Relationship between anhedonia and impulsivity in schizophrenia, major depression and schizoaffective disorder. *Asian Journal of Psychiatry* **6**, 577–580 (2013).

6. Chandurkar, A., Jaiswal, S. V. & Sawant, V. A. A study of cognition and anhedonia in patients with schizophrenia and depression. *IJMH* **4**, 351 (2017).

7. Singla, D. R. *et al.* Multiple mediation analysis of the peer-delivered Thinking Healthy Programme for perinatal depression: findings from two parallel, randomised controlled trials. *Br J Psychiatry* **218**, 143–150 (2021).

8. Patel, V. *et al.* The Healthy Activity Program (HAP), a lay counsellor-delivered brief psychological treatment for severe depression, in primary care in India: a randomised controlled trial. *The Lancet* **389**, 176–185 (2017).

9. Barbic, S. P., Durisko, Z. & Andrews, P. W. Measuring the bright side of being blue: a new tool for assessing analytical rumination in depression. *PLoS One* **9**, e112077 (2014).

10. Spitzer, R. L., Kroenke, K., Williams, J. B. W. & Löwe, B. A brief measure for assessing generalized anxiety disorder: the GAD-7. *Arch Intern Med* **166**, 1092–1097 (2006).

11. De Man, J. *et al.* Are the PHQ-9 and GAD-7 Suitable for Use in India? A Psychometric Analysis. *Frontiers in Psychology* **12**, (2021).

12. Chaudhary, A. P., Sonar, N. S., Tr, J., Banerjee, M. & Yadav, S. Impact on Mental Health of students due to restriction caused by COVID-19 pandemic: Cross-sectional study. 2021.02.07.21250695 Preprint at https://doi.org/10.1101/2021.02.07.21250695 (2021).

13. Hughes, M. E., Waite, L. J., Hawkley, L. C. & Cacioppo, J. T. A Short Scale for Measuring Loneliness in Large Surveys. *Res Aging* **26**, 655–672 (2004).

14. Garg, N., Sharma, N. & Burgess, J. Three-item loneliness scale: Exploring the psychometric properties in the Indian context. *Asian J Psychiatr* **80**, 103323 (2023).

15. Sancho-Domingo, C., Carballo, J. L., Coloma-Carmona, A. & Buysse, D. J. Brief version of the Pittsburgh Sleep Quality Index (B-PSQI) and measurement invariance across gender and age in a population-based sample. *Psychol Assess* **33**, 111–121 (2021).

16. Kumar, A., Handa, R., Upadhyaya, S. K. & Gupta, S. J. Validation of Hindi Version of the Pittsbugh Sleep Quality Index. *Journal of the Association of Physicians of India* (2021).

17. Schreiner, M. Simple Poverty Scorecard Poverty-Assessment Tool India. *Simple Poverty Scorecard* https://www.simplepovertyscorecard.com/IND_2009_ENG.pdf (2012).

18. Rush, A. J. *et al.* The Inventory for Depressive Symptomatology (IDS): preliminary findings. *Psychiatry Res* **18**, 65–87 (1986).

19. Lamers, F. *et al.* Identifying Depressive Subtypes in a Large Cohort Study: Results From the Netherlands Study of Depression and Anxiety (NESDA). *J Clin Psychiatry* **71**, 8450 (2010).

20. Hana, R. A. Nature and Course of Clinician and Self-Rated Depressive Features in Persons with Alcohol Use Disorders: A Preliminary Prospective Study among Men Seeking Treatment. *Addictology* (2022).

21. Kroenke, K., Spitzer, R. L. & Williams, J. B. W. The PHQ-15: validity of a new measure for evaluating the severity of somatic symptoms. *Psychosom Med* **64**, 258–266 (2002).

22. Shenoy V P, P. K. *et al.* Fear of Recurrence and Somatic Symptom Severity in Multiple Myeloma Patients: An Institution-Based Cross-Sectional Study. *Indian J Med Paediatr Oncol* **43**, 355–360 (2022).

23. Uher, R. *et al.* Adverse reactions to antidepressants. *The British Journal of Psychiatry* **195**, 202–210 (2009).

24. Marasine, N. R., Sankhi, S., Lamichhane, R., Marasini, N. R. & Dangi, N. B. Self-Reported Antidepressant Drug Side Effects, Medication Adherence, and Its Associated Factors among Patients Diagnosed with Depression at the Psychiatric Hospital of Nepal. *Depression Research and Treatment* **2020**, e7024275 (2020).

25. Perczel Forintos, D., Rózsa, S., Pilling, J. & Kopp, M. Proposal for a short version of the Beck Hopelessness Scale based on a national representative survey in Hungary. *Community Ment Health J* **49**, 822–830 (2013).

26. Thompson, E. R. Development and Validation of an Internationally Reliable Short-Form of the Positive and Negative Affect Schedule (PANAS). *Journal of Cross-Cultural Psychology* **38**, 227–242 (2007).

27. Garg, N., Katiyar, N. & Mehak, null. Gratitude Questionnaire (GQ-6)-Exploring Psychometric Properties in India. *J Relig Health* **60**, 3716–3731 (2021).

28. Patel, N. K., Nivethitha, L. & Mooventhan, A. Effect of a Yoga Based Meditation Technique on Emotional Regulation, Self-compassion and Mindfulness in College Students. *Explore (NY)* **14**, 443–447 (2018).

29. Wuthrich, V. M., Johnco, C. & Knight, A. Comparison of the Penn State Worry Questionnaire (PSWQ) and abbreviated version (PSWQ-A) in a clinical and non-clinical population of older adults. *J Anxiety Disord* **28**, 657–663 (2014).

30. Use of the Penn State Worry Questionnaire to Identify Individuals with Gad: An Indian Perspective. *1.1.Background and Objectives: The Penn State Worry Questionnaire (PSWQ) has been established as an efficacious tool to identify individuals with Generalized Anxiety Disorder (GAD) as against those with other anxiety disorders. We report on the use of the PSWQ in the Indian population to identify individuals with GAD. 1.2.Methods: 30 individuals with GAD and 60 with other anxiety disorders without GAD completed the PSWQ. 1.3.Results: Using the Receiver Operating Characteristic curve analysis, a score of 64, which optimized both sensitivity and specificity, was found to discriminate between individuals with GAD and those with other anxiety disorders without GAD. 1.4.Limitations:The study conducted on a small sample would benefit from further research to establish the PSWQ as an efficacious tool for identify individuals with GAD. 1.5.Conclusion: Results from the current study offer strong support for the use of the PSWQ for initial screening and identification of individuals with GAD who present for treatment for anxiety disorders.* **Volume 6**, (2016).

31. Topp, C. W., Østergaard, S. D., Søndergaard, S. & Bech, P. The WHO-5 Well-Being Index: A Systematic Review of the Literature. *PPS* **84**, 167–176 (2015).

32. Barua, A. *et al.* Validity of WHO-Five Well-Being Index for Screening of Depression in an Elderly Indian Population. *Indian Journal of Gerontology* **24**, 178–186 (2010).

33. Posner, K. *et al.* The Columbia-Suicide Severity Rating Scale: initial validity and internal consistency findings from three multisite studies with adolescents and adults. *Am J Psychiatry* **168**, 1266–1277 (2011).

34. Rahoof, F. V., Cherian, A. V., Kandasamy, A., Ezhumalai, S. & Dhanasekara, R. P. Suicidal Ideation among Persons with Alcohol Use Disorder: A Cross-Sectional Study. *J Psychosoc Well Being* **2**, 30–41 (2021).

35. Khadjesari, Z. *et al.* Validation of the AUDIT-C in adults seeking help with their drinking online. *Addiction Science & Clinical Practice* **12**, 2 (2017).

36. Carey, K. B., Carey, M. P. & Chandra, P. S. Psychometric Evaluation of the Alcohol Use Disorders Identification Test and Short Drug Abuse Screening Test with Psychiatric Patients in India. *J Clin Psychiatry* **64**, 767–774 (2003).

37. Moran, P. *et al.* Standardised Assessment of Personality – Abbreviated Scale (SAPAS): Preliminary validation of a brief screen for personality disorder. *The British Journal of Psychiatry* **183**, 228–232 (2003).

38. Innocent, S., Podder, P., Ram, J. R., Barnicot, K. & Sen, P. Using the SAPAS to identify risk for personality disorders among psychiatric outpatients in India: A feasibility study. *Personal Ment Health* **12**, 15–24 (2018).

39. Sen, P., Barnicot, K., Podder, P., Dasgupta, I. & Gormley, M. Exploring the prevalence of personality disorder and the feasibility of using the SAPAS as a screening tool for personality disorder in an emergency department in India. *Med Sci Law* **62**, 8–16 (2022).

40. Bagby, R. M., Parker, J. D. & Taylor, G. J. The twenty-item Toronto Alexithymia Scale--I. Item selection and cross-validation of the factor structure. *J Psychosom Res* **38**, 23–32 (1994).

41. Pandey, R., Mandal, M. K., Taylor, G. J. & Parker, J. D. Cross-cultural alexithymia: development and validation of a Hindi translation of the 20-Item Toronto Alexithymia Scale. *J Clin Psychol* **52**, 173–176 (1996).

42. Wuyek, L. A., Antony, M. M. & McCabe, R. E. Psychometric properties of the panic disorder severity scale: clinician-administered and self-report versions. *Clin Psychol Psychother* **18**, 234–243 (2011).

43. Mehta, V. S. & Ram, D. A Mixed-Methods Approach to Evaluate the Needs, Support, and Services for Common Mental Disorders: A Protocol Examining Two Community Extension Clinics. *Indian J Psychol Med* **42**, S57–S62 (2020).

44. Zuromski, K. L. *et al.* Developing an optimal short‐form of the PTSD Checklist for DSM‐5 (PCL‐5). *Depress Anxiety* **36**, 790–800 (2019).

45. Housen, T. *et al.* Prevalence of anxiety, depression and post-traumatic stress disorder in the Kashmir Valley. *BMJ Glob Health* **2**, e000419 (2017).

46. Wei, M., Russell, D. W., Mallinckrodt, B. & Vogel, D. L. The Experiences in Close Relationship Scale (ECR)-short form: reliability, validity, and factor structure. *J Pers Assess* **88**, 187–204 (2007).

47. Kumar, R. M. Assessing the Psychometric Properties of Hindi version of Experiences in Close Relationships – Revised (ECR-R) scale. *Indian Journal of Forensic Medicine & Toxicology* **16**, 402–406 (2022).

48. Rammstedt, B. & John, O. P. Measuring personality in one minute or less: A 10-item short version of the Big Five Inventory in English and German. *Journal of Research in Personality* **41**, 203–212 (2007).

49. Bashir, S. & Kumar, R. Differences in Big Five Personality Traits: A Cross Cultural Study of Kashmir & North East Adolescents. *Saudi Journal of Humanities and Social Sciences* **5**, 375–378 (2020).

50. Kunnel John, R., Xavier, B., Waldmeier, A., Meyer, A. & Gaab, J. Psychometric Evaluation of the BFI-10 and the NEO-FFI-3 in Indian Adolescents. *Frontiers in Psychology* **10**, (2019).

51. Zvolensky, M. J. *et al.* Refinement of anxiety sensitivity measurement: The Short Scale Anxiety Sensitivity Index (SSASI). *Psychiatry Res* **269**, 549–557 (2018).

52. Luszczynska, A., Scholz, U. & Schwarzer, R. The general self-efficacy scale: multicultural validation studies. *J Psychol* **139**, 439–457 (2005).

53. Ivascu, L. *et al.* Tertiary students maintaining control over depression, anxiety, and stress during the pandemic-An emerging market perspective. *Front Psychol* **13**, 990192 (2022).

54. Sinclair, S. J. *et al.* Psychometric properties of the Rosenberg Self-Esteem Scale: overall and across demographic groups living within the United States. *Eval Health Prof* **33**, 56–80 (2010).

55. Belhekar, V., Vader, V., Korgaonkar, A. & Dittakavi, S. *What Lies at the Center of Rosenberg Self-Esteem Scale? Network Analysis and Latent Structure of Rosenberg Self-Esteem Scale for Indian Data*. (2019). doi:10.13140/RG.2.2.32264.88328.

56. Vaishnavi, S., Connor, K. & Davidson, J. R. T. An abbreviated version of the Connor-Davidson Resilience Scale (CD-RISC), the CD-RISC2: Psychometric properties and applications in psychopharmacological trials. *Psychiatry Res* **152**, 293–297 (2007).

57. Singh, K. & Yu, N. X. Psychometric Evaluation of the Connor-Davidson Resilience Scale (CD-RISC) in a Sample of Indian Students. *Journal of Psychology* **1**, (2009).

58. de Graaf, L. E., Roelofs, J. & Huibers, M. J. H. Measuring Dysfunctional Attitudes in the General Population: The Dysfunctional Attitude Scale (form A) Revised. *Cognit Ther Res* **33**, 345–355 (2009).

59. Singh, G., Kaloiya, G. S., Dhawan, A., Balhara, Y. P. S. & Mishra, A. K. The Extent of Endorsement of Distal to Proximal Dysfunctional Cognitions in Individuals with Alcohol Dependence: A Comparative Cross-Sectional Study in the Indian Context. *Indian J Psychol Med* **44**, 239–245 (2022).

60. Preece, D. A., Becerra, R., Robinson, K. & Gross, J. J. The Emotion Regulation Questionnaire: Psychometric Properties in General Community Samples. *J Pers Assess* **102**, 348–356 (2020).

61. H K Manju & Basavarajappa. Role of Emotion Regulation in Quality of Life. *Int J Indian Psychol* **4**, (2016).

62. Felitti, V. J. *et al.* Relationship of childhood abuse and household dysfunction to many of the leading causes of death in adults. The Adverse Childhood Experiences (ACE) Study. *Am J Prev Med* **14**, 245–258 (1998).

63. Fernandes, G. S. *et al.* Adverse childhood experiences and substance misuse in young people in India: results from the multisite cVEDA cohort. *BMC Public Health* **21**, 1920 (2021).

64. Cohen. A Global Measure of Perceived Stress. *Journal of Health and Social Behavior* **24**, 385–396 (1983).

65. Pangtey, R., Basu, S., Meena, G. S. & Banerjee, B. Perceived Stress and its Epidemiological and Behavioral Correlates in an Urban Area of Delhi, India: A Community-Based Cross-Sectional Study. *Indian J Psychol Med* **42**, 80–86 (2020).

66. Patel, A. R., Weobong, B., Patel, V. H. & Singla, D. R. Psychological treatments for depression among women experiencing intimate partner violence: findings from a randomized controlled trial for behavioral activation in Goa, India. *Arch Womens Ment Health* **22**, 779–789 (2019).

67. Zimet, G. D., Powell, S. S., Farley, G. K., Werkman, S. & Berkoff, K. A. Psychometric characteristics of the Multidimensional Scale of Perceived Social Support. *J Pers Assess* **55**, 610–617 (1990).

68. Kaur, K. & Beri, N. Psychometric Properties Of Multidimensional Scale Of Perceived Social Support (MSPSS): Indian Adaptation. **8**, 6 (2019).

69. Saltychev, M., Katajapuu, N., Bärlund, E. & Laimi, K. Psychometric properties of 12-item self-administered World Health Organization disability assessment schedule 2.0 (WHODAS 2.0) among general population and people with non-acute physical causes of disability - systematic review. *Disabil Rehabil* **43**, 789–794 (2021).

70. Subramaniam, M. *et al.* Validation of the World Health Organization Disability Assessment Schedule 2.0 among older adults in an Asian country. *Singapore Med J* **61**, 246–253 (2020).

71. Lee, P. H., Macfarlane, D. J., Lam, T. H. & Stewart, S. M. Validity of the International Physical Activity Questionnaire Short Form (IPAQ-SF): a systematic review. *Int J Behav Nutr Phys Act* **8**, 115 (2011).

72. Wani, R. T. & Nabi, S. S. Reliability and Validity of a Culturally Adaptive Version of the International Physical Activity Questionnaire in Indian Subcontinent: A Cross-sectional Study. *Int J Prev Med* **11**, 40 (2020).

73. Tyrer, P. *et al.* The Social Functioning Questionnaire: a rapid and robust measure of perceived functioning. *Int J Soc Psychiatry* **51**, 265–275 (2005).

74. Chisholm, D. *et al.* Client Socio-Demographic and Service Receipt Inventory – European Version: development of an instrument for international research: EPSILON Study 5. *The British Journal of Psychiatry* **177**, s28–s33 (2000).

75. Lee, J., Banerjee, J., Khobragade, P. Y., Angrisani, M. & Dey, A. B. LASI-DAD study: a protocol for a prospective cohort study of late-life cognition and dementia in India. *BMJ Open* **9**, e030300 (2019).

76. Chien, S. *et al.* Harmonized LASI-DAD A.3.pdf.

77. Herzallah, M. M. *et al.* Learning from negative feedback in patients with major depressive disorder is attenuated by SSRI antidepressants. *Front Integr Neurosci* **7**, 67 (2013).

78. Herzallah, M., Taha, M., Natsheh, J., Sehwail, M. & Gluck, M. Cognitive assessments prospectively differentiate future responders and non-responders to selective serotonin reuptake inhibitor treatment among medication-naïve patients with major depressive disorder. in doi:426.06/AA15.

79. Herzallah, M. M. *et al.* Depression Reduces Accuracy While Parkinsonism Slows Response Time for Processing Positive Feedback in Patients with Parkinson’s Disease with Comorbid Major Depressive Disorder Tested on a Probabilistic Category-Learning Task. *Front Psychiatry* **8**, 84 (2017).
